# Supplementary material for: Idiopathic pulmonary fibrosis disease progression: a dynamic quantitative chest computed tomography follow-up analysis
Source: PubMed Central journal article supplement — Quant Imaging Med Surg. 2023 Jan 9;13(3):1488–98. doi: 10.21037/qims-22-843 (PMC10006139; doi:10.21037/qims-22-843), 2023-01-09
Supplement: qims-13-03-1488-supplementary.pdf [file qims-13-03-1488-supplementary.pdf]

**Table S1** Correlation coefficients (R) between extent of lesions ratio, vascular parameters, and lung function

| Characteristics                           | VC%   |         | FVC%  |         | FEV1% |         | TLC%  |         | DLco% |         |
|-------------------------------------------|-------|---------|-------|---------|-------|---------|-------|---------|-------|---------|
|                                           | R     | P-value |
| Total lung volume (mL)                    | 0.40  | <0.001  | 0.46  | <0.001  | 0.45  | <0.001  | 0.44  | <0.001  | 0.05  | 0.613   |
| Total lesion volume ratio (%)             | -0.52 | <0.001  | -0.49 | <0.001  | -0.46 | <0.001  | -0.43 | <0.001  | -0.66 | <0.001  |
| Right upper lung lesion volume ratio (%)  | -0.50 | <0.001  | -0.48 | <0.001  | -0.40 | <0.001  | -0.46 | <0.001  | -0.62 | <0.001  |
| Right middle lung lesion volume ratio (%) | -0.48 | <0.001  | -0.46 | <0.001  | -0.42 | <0.001  | -0.40 | <0.001  | -0.59 | <0.001  |
| Right lower lung lesion volume ratio (%)  | -0.45 | <0.001  | -0.47 | <0.001  | -0.45 | <0.001  | -0.38 | <0.001  | -0.62 | <0.001  |
| Left upper lung lesion volume ratio (%)   | -0.26 | <0.001  | -0.20 | <0.001  | -0.23 | <0.001  | -0.18 | 0.050   | -0.56 | <0.001  |
| Left middle lung lesion volume ratio (%)  | -0.42 | <0.001  | -0.37 | <0.001  | -0.36 | <0.001  | -0.35 | <0.001  | -0.52 | <0.001  |
| Left lower lung lesion volume ratio (%)   | -0.27 | <0.001  | -0.25 | <0.001  | -0.26 | <0.001  | -0.22 | 0.016   | -0.46 | <0.001  |
| Pulmonary vascular indexes                |       |         |       |         |       |         |       |         |       |         |
| TPVV (mL)                                 | 0.34  | <0.001  | 0.39  | <0.001  | 0.38  | <0.001  | 0.41  | <0.001  | 0.32  | <0.001  |
| TPVV (%)                                  | 0.07  | 0.476   | 0.06  | 0.482   | 0.04  | 0.647   | 0.09  | 0.334   | 0.35  | <0.001  |
| Number of pulmonary vessel branches       | 0.23  | <0.001  | 0.29  | <0.001  | 0.28  | <0.001  | 0.32  | <0.001  | 0.3   | <0.001  |
| PAV (mL)                                  | 0.32  | <0.001  | 0.37  | <0.001  | 0.38  | <0.001  | 0.38  | <0.001  | 0.35  | <0.001  |
| PAV (%)                                   | 0     | 0.978   | 0.02  | 0.865   | 0.03  | 0.757   | 0     | 0.998   | 0.39  | <0.001  |
| Number of pulmonary artery branches       | 0.25  | <0.001  | 0.30  | <0.001  | 0.32  | <0.001  | 0.34  | <0.001  | 0.33  | <0.001  |
| PVV (mL)                                  | 0.33  | <0.001  | 0.38  | <0.001  | 0.35  | <0.001  | 0.41  | <0.001  | 0.26  | <0.001  |
| PVV (%)                                   | 0.12  | 0.183   | 0.12  | 0.171   | 0.10  | 0.285   | 0.15  | 0.103   | 0.29  | <0.001  |
| Number of pulmonary vein branches         | 0.22  | <0.001  | 0.27  | <0.001  | 0.25  | <0.001  | 0.30  | <0.001  | 0.29  | <0.001  |

VC%, percentage of predicted vital capacity; FVC%, percentage of predicted forced vital capacity; FEV1%, percentage of predicted forced expiratory volume in 1 second; TLC%, percentage of predicted total lung capacity; DLco%, percentage of predicted diffusing lung capacity for carbon monoxide. TPVV, total pulmonary vessel volume; PAV, pulmonary artery volume; PVV, pulmonary vein volume. Correlations with statistical significance are highlighted in bold.

**Table S2** Correlation coefficients (R) between changes in extent of lung lesion ratio, vascular parameters, and lung function

| Characteristics                            | VC%   |         | FVC%  |         | FEV1% |         | TLC%  |         | DLco% |         |
|--------------------------------------------|-------|---------|-------|---------|-------|---------|-------|---------|-------|---------|
|                                            | R     | P-value |
| Changes in total lung volume (mL)          | 0.46  | <0.001  | 0.40  | <0.001  | 0.46  | <0.001  | 0.31  | <0.001  | 0.36  | 0.613   |
| Changes in extent of lung lesion ratio (%) |       |         |       |         |       |         |       |         |       |         |
| Total lesion volume ratio (%)              | -0.51 | <0.001  | -0.54 | <0.001  | -0.49 | <0.001  | -0.38 | <0.001  | -0.57 | <0.001  |
| Right upper lung lesion volume ratio (%)   | -0.54 | <0.001  | -0.59 | <0.001  | -0.62 | <0.001  | -0.45 | <0.001  | -0.53 | <0.001  |
| Right middle lung lesion volume ratio (%)  | -0.46 | <0.001  | -0.44 | <0.001  | -0.45 | <0.001  | -0.34 | <0.001  | -0.50 | <0.001  |
| Right lower lung lesion volume ratio (%)   | -0.29 | <0.001  | -0.32 | <0.001  | -0.23 | <0.001  | -0.28 | <0.001  | -0.37 | <0.001  |
| Left upper lung lesion volume ratio (%)    | -0.55 | <0.001  | -0.54 | <0.001  | -0.50 | <0.001  | -0.27 | <0.001  | -0.48 | <0.001  |
| Left middle lung lesion volume ratio (%)   | -0.28 | <0.001  | -0.32 | <0.001  | -0.28 | <0.001  | -0.17 | 0.056   | -0.27 | <0.001  |
| Left lower lung lesion volume ratio (%)    | -0.13 | 0.159   | -0.13 | 0.169   | -0.09 | 0.321   | -0.02 | 0.862   | -0.18 | 0.046   |
| Changes in pulmonary vascular indexes      |       |         |       |         |       |         |       |         |       |         |
| TPVV (mL)                                  | 0.74  | <0.001  | 0.61  | <0.001  | 0.64  | <0.001  | 0.43  | <0.001  | 0.53  | <0.001  |
| TPVV (%)                                   | 0.61  | <0.001  | 0.51  | <0.001  | 0.49  | <0.001  | 0.34  | <0.001  | 0.45  | <0.001  |
| Number of pulmonary vessel branches        | 0.69  | <0.001  | 0.55  | <0.001  | 0.61  | <0.001  | 0.41  | <0.001  | 0.44  | <0.001  |
| PAV (mL)                                   | 0.67  | <0.001  | 0.57  | <0.001  | 0.58  | <0.001  | 0.40  | <0.001  | 0.50  | <0.001  |
| PAV (%)                                    | 0.56  | <0.001  | 0.49  | <0.001  | 0.42  | <0.001  | 0.31  | <0.001  | 0.44  | <0.001  |
| Number of pulmonary artery branches        | 0.59  | <0.001  | 0.44  | <0.001  | 0.54  | <0.001  | 0.31  | <0.001  | 0.27  | <0.001  |
| PVV (mL)                                   | 0.71  | <0.001  | 0.58  | <0.001  | 0.62  | <0.001  | 0.41  | <0.001  | 0.51  | <0.001  |
| PVV (%)                                    | 0.62  | <0.001  | 0.52  | <0.001  | 0.52  | <0.001  | 0.37  | <0.001  | 0.44  | <0.001  |
| Number of pulmonary vein branches          | 0.66  | <0.001  | 0.56  | <0.001  | 0.61  | <0.001  | 0.41  | <0.001  | 0.45  | <0.001  |

VC%, percentage of predicted vital capacity; FVC%, percentage of predicted forced vital capacity; FEV1%, percentage of predicted forced expiratory volume in 1 second; TLC%, percentage of predicted total lung capacity; DLco%, percentage of predicted diffusing lung capacity for carbon monoxide. TPVV, total pulmonary vessel volume; PAV, pulmonary artery volume; PVV, pulmonary vein volume. Correlations with statistical significance are highlighted in bold.
